# Supplementary material
Source: Springer Nature journal article supplement (https://www.springermedizin.de/resource/supplementary/13075_2010_9739_MOESM4_ESM.pdf/9693592)

LO HC 38621  
 HI FDR 3811  
 HI HC 93371  
 HI HC 89587  
 SIE 48310  
 SIE 48320  
 SIE 48330  
 LO FDR 96996  
 HI FDR 93812  
 HI HC 93812  
 HI FDR 92926  
 HI HC 92926  
 SIE 30853  
 SIE 30853  
 LO FDR 99440  
 HI HC 99440  
 HI HC 74869  
 HI HC 95621  
 HI HC 95621  
 HI HC 97906  
 HI HC 97906  
 HI HC 89765  
 HI HC 89765  
 LO FDR 99879  
 LO FDR 39959  
 HI HC 39959  
 HI HC 21466  
 SIE 92908  
 SIE 92908  
 SIE 11798  
 SIE 28612  
 SIE 13161  
 HI FDR 92488  
 SIE 92488  
 SIE 92488  
 HI HC 73452  
 HI HC 99382  
 LO HC 10215  
 HI HC 10215  
 HI HC 45319  
 HI HC 45319  
 SIE 9653984  
 SIE 9653984  
 LO HC 45984  
 LO HC 49867

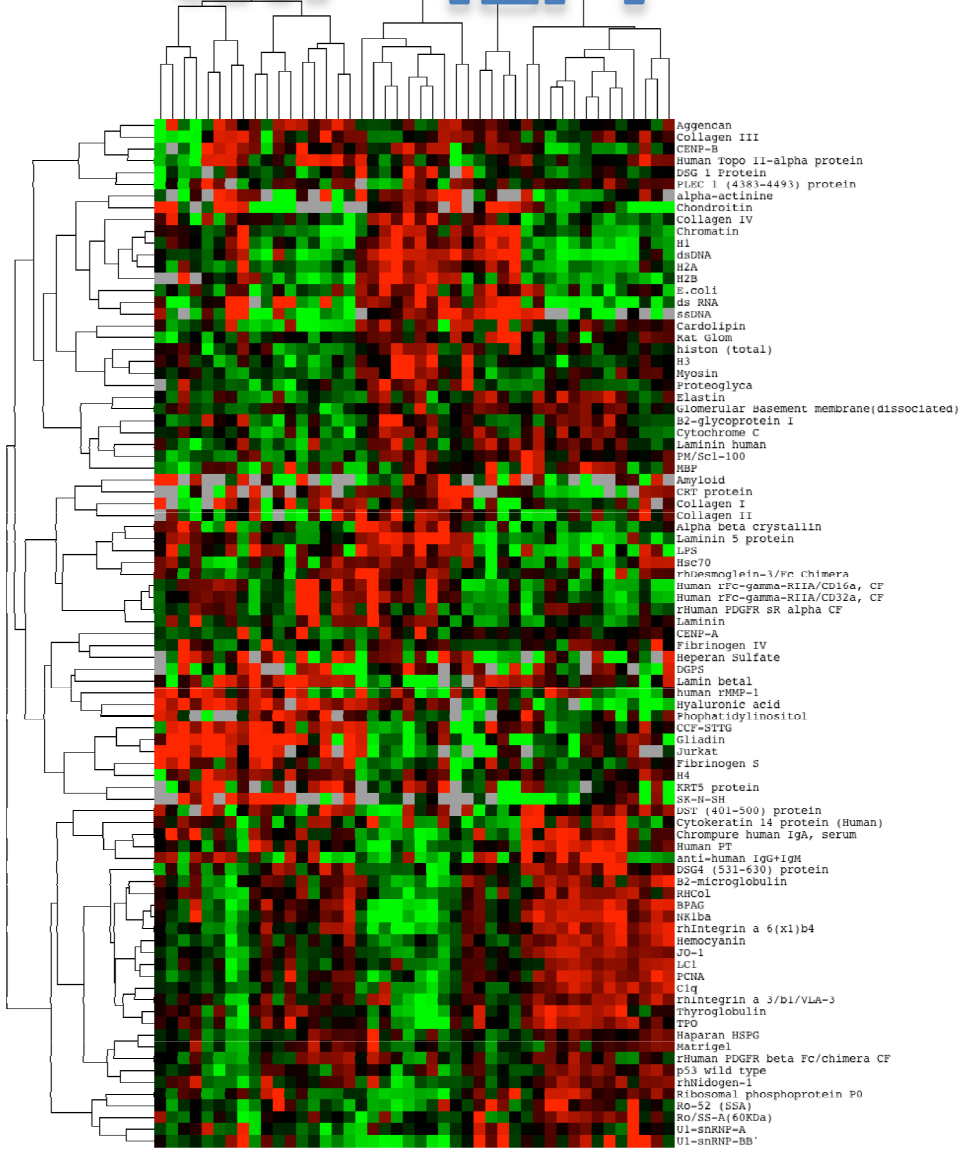

Supplement: MOESM4 [file 9693592]
